# Supplementary material for: Tyrp1 is the mendelian determinant of the Axolotl (Ambystoma mexicanum) copper mutant
Source: PubMed Central journal article supplement — Sci Rep. 2024 Sep 27;14:22399. doi: 10.1038/s41598-024-73283-1 (PMC11436669; doi:10.1038/s41598-024-73283-1), 2024-09-27
Supplement: 41598_2024_73283_MOESM1_ESM.pdf [file 41598_2024_73283_MOESM1_ESM.pdf]

1 10 20 30 40 50 60 70 80 90 100 110 120 130  
ATGCTCGGGCCCGCCACATTCCTGCCGCTGACCGGGCGCTCTTGCTGCTTATACCTGGAGGGCGAGCGCAGTTCCTCCCGCCAGTGCCTGACCCCGAGGCTCTCCGAGTGGCCAGTGTGCCTGGCCCTCTTCC

140 150 160 170 180 190 200 210 220 230 240 250 260 270  
CTGCGCTGACACCGGACCCAGCAGACAGATGCGGGGCTTCCGTGGGCCGGGGCGTTGTGCGCCTCTGCAGGTGGATGCCGACCCACACGGGCCCCAGTATCCACACGATGGAGTGGATGACCGGGAGCAATGGCC

280 290 300 310 320 330 340 350 360 370 380 390 400  
GACCCGCTTCTTCAACAACCTCTTGCCTGTGTGCAGAAAACCTCTCTGGCTACGACTGTGGGTCTCTGCAAAACCAGGCTGGGTCTGGAGTCAACTGCAACCAGAGGGTACTGGCAGTCAGGCGGAACATCTTGGATCTG

410 420 430 440 450 460 470 480 490 500 510 520 530 540  
ACTGCACAGGAGAGGGCGTCGCTTTATTGCTGCCCTGGACTTGCCAAAAGAACCACACATCTCACTACGTCATCGCTCGGGAGATATGCAGAGATCATGGGACCCGATGGCAACAGCACCCAGTTTGAGAATG

550 560 570 580 590 600 610 620 630 640 650 660 670 680  
TGTCGATTTACAACCTCTTTGTATGGACCCATTACTACTCCATTGGCAAGACTTTTCTTGTTGCCGTTCTGGGAGAGTTTTGGTGGCATAGACTTCTCCACGAGGGCCCTGCATTTGTTACCTGGCACAGGTACCA

690 700 710 720 730 740 750 760 770 780 790 800 810  
CCTGCTACAACCTGAAAGGGATATGCAGGAGATGCTTCAAGATCCCACCTTTGCTCTTCCATATTGGAATTTTGTATTGGTGGCAATGAATGCGACATCTGCACTGACGACTTCATGGGTGCTCGGAGCAACTTC

820 830 840 850 860 870 880 890 900 910 920 930 940 950  
GATTCATTCTTTTGAAGTTCCAACCTGTTTTTTCCCAATGGCGCGTTCTTTGCGAAAGCTTGGAAAGATTATGACACACTAGGAAACAATATGTAAACAGCACAGAGGGTGGTCCAAATCGAAGGAACCCGGAGGCA

960 970 980 990 1,000 1,010 1,020 1,030 1,040 1,050 1,060 1,070 1,080  
ATGTAGCCAGGCCGATGGTTTCAGCGCCTCCCTGAACCACAGGATGTTGCCCTTTGCCCTTGGAAAGTTGGTTTATTGACACGCCACCTTCTATTCCAACCTCGTCTGAAAGCTTTGAAATACAGTTGAAGGATATAG

1,090 1,100 1,110 1,120 1,130 1,140 1,150 1,160 1,170 1,180 1,190 1,200 1,210 1,220  
TGAGCCTTCTGGAAAATATGATCCTTCAGTTTGAAGCCTCCACAATTTGGCGCACCTGTTCTGAAATGGAACTGGAGGACAACTCACGTGTCCCTAATGACCCTATATTTGTTCTTCTGCACACGTTTACTGAT

1,230 1,240 1,250 1,260 1,270 1,280 1,290 1,300 1,310 1,320 1,330 1,340 1,350 1,360  
GCAGTATTTGACGAATGGCTGAGGAGACATAATGCTGATATTTTCGCTTTACCCACTGGAGAATGCCCTATTGGACACAACAGACAGTACAACATGGTGCCTTCTGGCCCCAGTTTCCAACAATGAGATGTTTG

1,370 1,380 1,390 1,400 1,410 1,420 1,430 1,440 1,450 1,460 1,470 1,480 1,490  
TTACTGCACCGGAGAGCCTCGGATATTCGATGAAGTCCAGTGGCCTAGTCGTGCTTTGAATTTACGGAGATCATAACCATCGCTGTGGTGGCAGCTTTGTGCTGGTTGCTGTGATCTTCGCTGCTGCTTCTTG

1,500 1,510 1,520 1,530 1,540 1,550 1,560 1,570 1,580 1,590 1,600 1,605  
CGCGGTGCATCGGAGCAGGAAAGATGACGTTTCAACCAACCTCTTCTTGGCGAGCAGTATCCTCGGTACTCGGAAGAATATGAAAGGGATGCAAGTCAAGTCTGCTGTTTGA

Exon 2  
Exon 2  
Exon 2  
Exon 3  
Exon 3  
Exon 3  
Exon 3  
Exon 3  
Exon 3  
Exon 4  
Exon 4  
Exon 5  
Exon 5  
Exon 6  
Exon 6  
Exon 7  
Exon 7  
Exon 8  
Exon 8

Deleted Nucleotide Copper Sequence
