# Supplementary figures and images for: Tyrp1 is the mendelian determinant of the Axolotl (Ambystoma mexicanum) copper mutant
Source: PubMed Central journal article supplement — Sci Rep. 2024 Sep 27;14:22399. doi: 10.1038/s41598-024-73283-1 (PMC11436669; doi:10.1038/s41598-024-73283-1), 2024-09-27

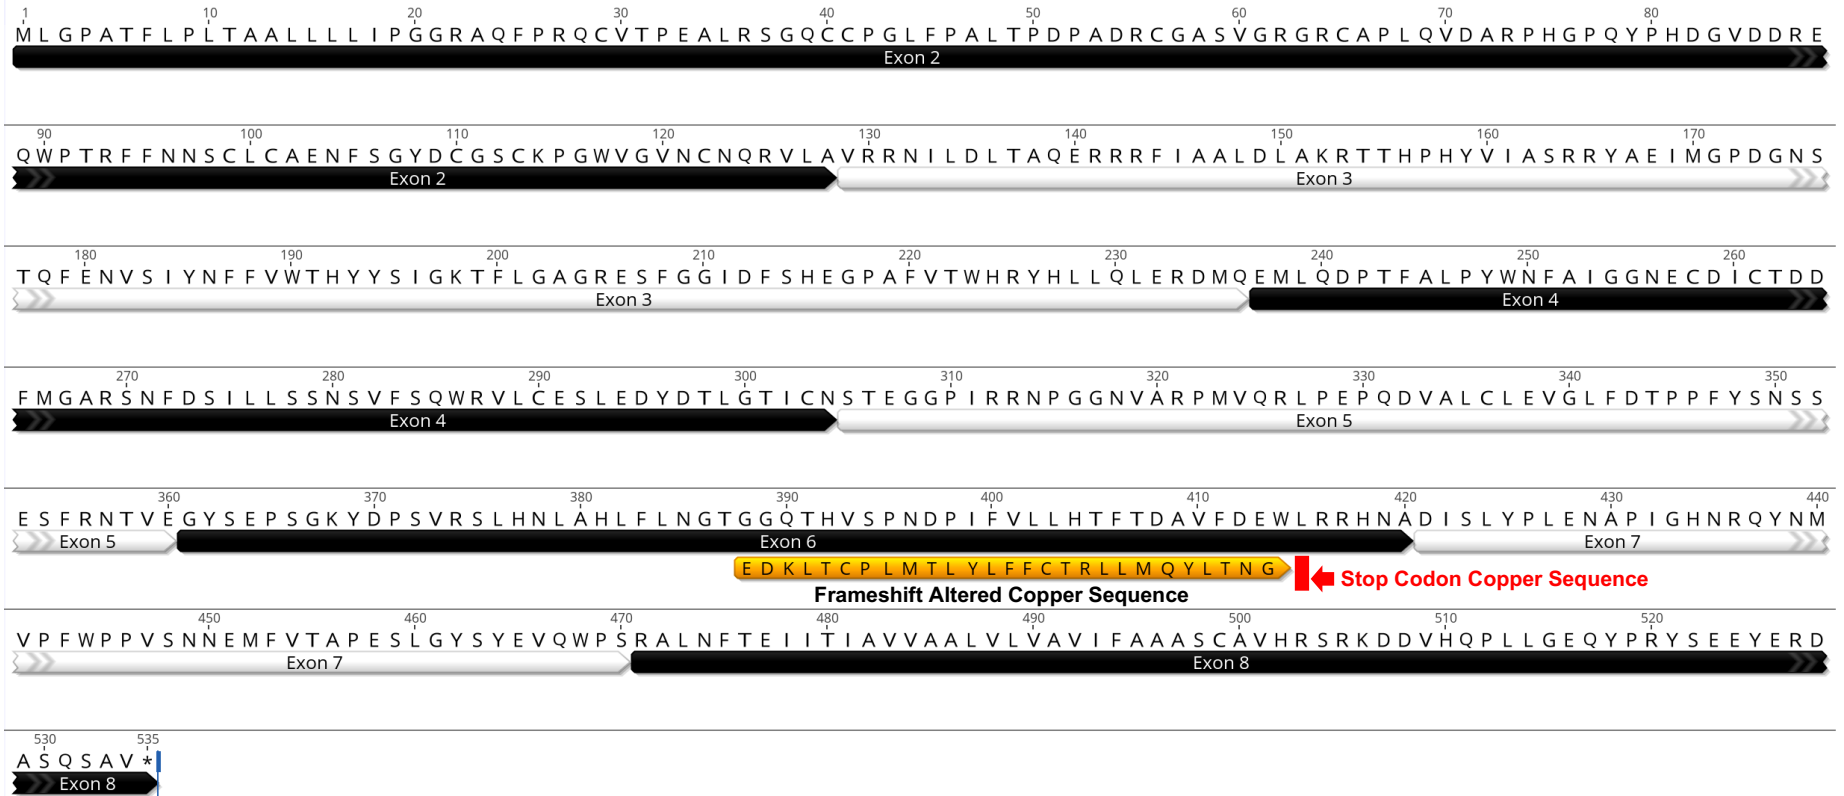

Supplement: 41598_2024_73283_MOESM2_ESM.pdf [file 41598_2024_73283_MOESM2_ESM.pdf]

A)

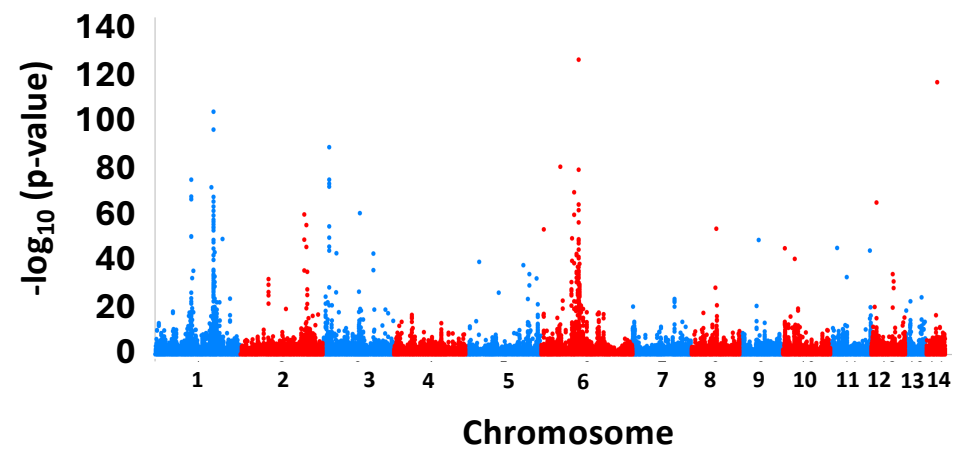

B)

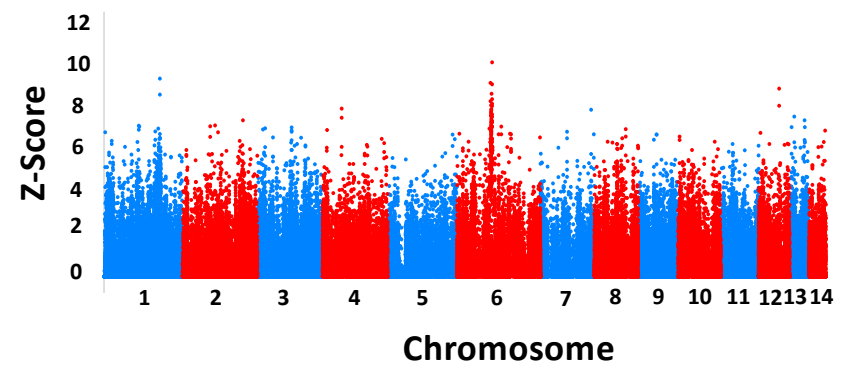

Supplement: 41598_2024_73283_MOESM3_ESM.pdf [file 41598_2024_73283_MOESM3_ESM.pdf]
